# Supplementary material
Source: publisher figshare collection journal article supplement (https://brill.figshare.com/ndownloader/files/15353588)
Supplement: Supplementary file 1 [file 15353588]

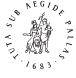

BRILL

RUSSIAN HISTORY 46 (2019) 84-101

RUSSIAN HISTORY

brill.com/ruhi

# The Policy of Russifying in Late Imperial Russia and its Failure

*Boris N. Mironov*

St. Petersburg State University, Russian Federation

## Abstract

After the Great Reforms of the 1860s – 1870s the Russian government embarked on the construction of a modern nation-state and was faced with the need to unify all parts of the empire administratively, culturally, legally, and socially. The new ethno-confessional policy in Russian historiography is often called Russification because the order established after the Great Reforms in the Great Russian provinces served as a model for the transformation of all parts of the empire. The Russification policy included many aspects, including Russifying [*obrusenie*] - the introduction of the Russian language as obligatory in the record keeping of public institutions, in court and administration, in education and everyday life. While the policy of Russifying has found ample reflection in the historiography, its results have been insufficiently studied. The purpose of this article is to fill this gap and to try to assess the process of Russifying ethnic minorities at the imperial level, drawing upon the first general census of the Russian Empire in 1897. The analysis has led to the conclusion that the policy of Russifying did not provide the expected results.

## Keywords

Late Imperial Russia – Russification – Russifying – pseudo-Russifying – the First General Census

## Supplementary Material

TABLE 1 *Change in the percentage of "Russians" among the population of the Russian Empire in 1857–1897 (%)*\*

| Age                                                                          | Year of Birth | European Russia | Vistula Provinces | Caucasus | Siberia | Central Asia |
|------------------------------------------------------------------------------|---------------|-----------------|-------------------|----------|---------|--------------|
| 1–                                                                           | 1897          | 82.3            | 4.8               | 47.2     | 86.2    | 28.0         |
| 1–9                                                                          | 1887–1896     | 80.3            | 4.5               | 31.7     | 82.2    | 9.0          |
| 10–19                                                                        | 1877–1886     | 79.6            | 4.6               | 34.9     | 82.1    | 8.8          |
| 20–29                                                                        | 1867–1876     | 79.4            | 16.3              | 34.5     | 79.4    | 9.6          |
| 30–39                                                                        | 1857–1866     | 80.1            | 5.3               | 33.5     | 79.5    | 8.0          |
| 40–49                                                                        | 1847–1856     | 80.4            | 4.9               | 35.6     | 79.6    | 7.9          |
| 50–59                                                                        | 1837–1846     | 80.1            | 4.7               | 35.3     | 79.7    | 7.8          |
| 60+                                                                          | 1827–1836     | 80.1            | 4.3               | 30.8     | 79.8    | 7.9          |
| Change in the percentage of "Russians" from 1827–1836 to 1887–1896           |               | 0.2             | 0.2               | 0.9      | 2.4     | 1.1          |
| Increase in the percentage of "Russians" among infants up to one year of age |               | 2.0             | 0.3               | 15.5     | 4.0     | 19.0         |
| Percentage of "Russians" in 1897                                             |               | 80.0            | 6.7               | 34.0     | 80.9    | 8.9          |

*Source:* Calculated from *Obshchii svod po imperii rezul'tatov razrabotki dannykh pervoi vseobshchei perepisi naseleniia, proizvedennoi 28 ianvaria 1897 goda*: in 2 vols. (St. Petersburg: Tipografiia N. L. Nyrkina, 1905), 2:134–75.

\* Among those who indicated a native language.

TABLE 2 *Change in the percentage of "Russians" among the rural (R) and urban (U) populations of the Russian Empire in 1857-1897 (%)\**

| Age                                                                          | Year of Birth | European Russia |      | Vistula Provinces |      | Caucasus |      | Siberia |      | Central Asia |      |
|------------------------------------------------------------------------------|---------------|-----------------|------|-------------------|------|----------|------|---------|------|--------------|------|
|                                                                              |               | R               | U    | R                 | U    | R        | U    | R       | U    | R            | U    |
| 1-                                                                           | 1897          | 83.2            | 74.4 | 5.1               | 3.5  | 46.5     | 51.8 | 85.9    | 90.2 | 23.9         | 47.4 |
| 1-9                                                                          | 1887-1896     | 81.4            | 70.2 | 4.8               | 3.4  | 30.4     | 43.2 | 81.8    | 89.6 | 7.2          | 24.3 |
| 10-19                                                                        | 1877-1886     | 80.5            | 72.6 | 4.9               | 3.3  | 33.9     | 41.3 | 81.6    | 88.3 | 6.9          | 25.1 |
| 20-29                                                                        | 1867-1876     | 80.3            | 74.9 | 10.9              | 28.3 | 32.2     | 45.6 | 79.0    | 82.9 | 5.7          | 33.0 |
| 30-39                                                                        | 1857-1866     | 80.9            | 76.0 | 5.5               | 4.7  | 32.0     | 43.2 | 79.4    | 80.7 | 6.0          | 22.8 |
| 40-49                                                                        | 1847-1856     | 81.3            | 75.3 | 5.2               | 4.1  | 34.2     | 44.4 | 79.3    | 83.1 | 6.0          | 21.2 |
| 50-59                                                                        | 1837-1846     | 81.0            | 73.4 | 5.1               | 3.2  | 34.1     | 43.4 | 79.2    | 85.2 | 6.0          | 20.2 |
| 60+                                                                          | 1827-1836     | 81.0            | 73.5 | 4.7               | 2.6  | 29.5     | 40.9 | 79.2    | 87.5 | 6.3          | 20.4 |
| Change in the percentage of "Russians" from 1827-1836 to 1887-1896           |               | 0.4             | -3.3 | 0.1               | 0.8  | 0.9      | 2.3  | 2.6     | 2.1  | 0.9          | 3.9  |
| Increase in the percentage of "Russians" among infants up to one year of age |               | 1.8             | 4.2  | 0.3               | 0.1  | 16.1     | 8.6  | 4.1     | 0.6  | 16.7         | 23.1 |
| Percentage of "Russians" in 1897                                             |               | 81.0            | 73.6 | 5.9               | 9.4  | 32.5     | 43.6 | 80.5    | 85.3 | 6.6          | 25.7 |

Source: Calculated from *Obshchii svod po imperii rezul'tatov razrabotki dannykh pervoi vseobshchei perepisi naseleniia, proizvedennoi 28 ianvaria 1897 goda*: in 2 vols. (St. Petersburg: Tipografiia N. L. Nyrkina, 1905), 2:134-75.

\*Among those who indicated a native language.

TABLE 3 *Change in the percentage of "Russians" among the male and female rural population of the Russian Empire in 1827-1897 (%)\**

| Age                                                                          | Year of Birth | European Russia |      | Vistula Provinces |     | Caucasus |      | Siberia |      | Central Asia |      |
|------------------------------------------------------------------------------|---------------|-----------------|------|-------------------|-----|----------|------|---------|------|--------------|------|
|                                                                              |               | M               | W    | M                 | W   | M        | W    | M       | W    | M            | W    |
| 1-                                                                           | 1897          | 82.2            | 82.5 | 4.7               | 4.9 | 45.9     | 48.6 | 86.1    | 86.3 | 27.9         | 28.2 |
| 1-9                                                                          | 1887-1896     | 80.2            | 80.5 | 4.5               | 4.5 | 30.9     | 32.5 | 82.2    | 82.3 | 9.0          | 9.0  |
| 10-19                                                                        | 1877-1886     | 79.5            | 79.6 | 4.6               | 4.5 | 33.1     | 36.8 | 81.6    | 82.6 | 8.4          | 9.3  |
| 20-29                                                                        | 1867-1876     | 79.0            | 79.7 | 26.2              | 5.0 | 34.6     | 34.4 | 77.5    | 81.5 | 10.7         | 8.4  |
| 30-39                                                                        | 1857-1866     | 79.9            | 80.4 | 5.8               | 4.8 | 33.1     | 34.0 | 77.4    | 81.9 | 7.7          | 8.4  |
| 40-49                                                                        | 1847-1856     | 80.0            | 80.9 | 5.3               | 4.6 | 35.3     | 35.9 | 77.9    | 81.5 | 7.5          | 8.4  |
| 50-59                                                                        | 1837-1846     | 79.4            | 80.7 | 5.0               | 4.4 | 34.4     | 36.4 | 78.3    | 81.2 | 6.9          | 8.9  |
| 60+                                                                          | 1827-1836     | 79.4            | 80.8 | 4.7               | 3.8 | 31.7     | 29.8 | 79.5    | 80.1 | 7.0          | 9.2  |
| Change in the percentage of "Russians" from 1827-1836 to 1887-1896           |               | 0.8             | -0.3 | -0.2              | 0.7 | -0.8     | 2.7  | 2.7     | 2.2  | 2.0          | -0.2 |
| Increase in the percentage of "Russians" among infants up to one year of age |               | 2.0             | 2.0  | 0.2               | 0.4 | 15.0     | 16.1 | 3.9     | 4.0  | 18.9         | 19.2 |
| Percentage of "Russians" in 1897                                             |               | 79.8            | 80.3 | 8.8               | 4.6 | 33.3     | 34.7 | 79.9    | 82.0 | 8.8          | 9.1  |

Source: Calculated from *Obshchii svod po imperii rezul'tatov razrabotki dannyykh pervoi vseobshchei perepisi naseleniia, proizvedennoi 28 ianvaria 1897 goda*: in 2 vols. (St. Petersburg: Tipografiia N. L. Nyrkina, 1905), 2:134-75.

\*Among those who indicated a native language.

TABLE 4 *Change in the percentage of Russians, Ukrainians, and Belorussians among the population of the Russian Empire in 1827–1897 (%)*\*

| Age   | Year of Birth | Millions | Percentage               |     |     |          |            |              |
|-------|---------------|----------|--------------------------|-----|-----|----------|------------|--------------|
|       |               |          | Population of the Empire |     |     | Russians | Ukrainians | Belorussians |
| 1–9   | 1887–1896     | 30.0     | 12.5                     | 5.9 | 1.5 | 42       | 20         | 5            |
| 10–19 | 1877–1886     | 26.5     | 11.5                     | 4.9 | 1.3 | 43       | 18         | 5            |
| 20–29 | 1867–1876     | 20.4     | 9.1                      | 3.4 | 0.9 | 45       | 17         | 4            |
| 30–39 | 1857–1866     | 15.8     | 7                        | 2.7 | 0.7 | 44       | 17         | 4            |
| 40–49 | 1847–1856     | 11.7     | 5.5                      | 2   | 0.5 | 47       | 17         | 4            |
| 50–59 | 1837–1846     | 8.3      | 3.8                      | 1.4 | 0.3 | 46       | 17         | 4            |
| 60+   | 1827–1836     | 8.6      | 4.1                      | 1.3 | 0.4 | 48       | 15         | 5            |

Sources: Calculated from *Pervaia vseobshchaia perepis' naseleniia*: in 89 vols. St. Petersburg, 1899–1905), vol. 1–89, table XV.

\*Among those who indicated a native language.

TABLE 5 *Literacy rate in Russian and in the native language among the various peoples of the empire in 1897 (%)*

| Peoples         | Literacy Rate, % |                 |
|-----------------|------------------|-----------------|
|                 | Russian          | Native Language |
| Latvians        | 36.6             | 47.8            |
| Germans         | 31.8             | 40.4            |
| Jews            | 31.1             | 17.8            |
| Estonians       | 29.9             | 63.6            |
| Bulgarians      | 28.3             | 0.2             |
| <b>Russians</b> | 27.0             | 0.0             |
| Greeks          | 23.7             | 11.0            |
| Northern Finns  | 20.9             | 11.9            |
| Ukrainians      | 18.5             | 0.1             |
| Belorussians    | 17.9             | 1.9             |
| Poles           | 17.5             | 21.5            |
| Others          | 11.9             | 9.7             |
| Volga Peoples   | 9.7              | 0.1             |
| Lithuanians     | 8.4              | 39.7            |
| Moldovans       | 8.1              | 0.3             |

| Peoples                   | Literacy Rate, % |                 |
|---------------------------|------------------|-----------------|
|                           | Russian          | Native Language |
| Armenians                 | 7.9              | 8.2             |
| Georgians                 | 5.5              | 12.5            |
| Tatars                    | 2.9              | 13.4            |
| Small Siberian Nations    | 2.4              | 2.6             |
| Kalmyks                   | 1.8              | 2.3             |
| Caucasus Mountain Peoples | 1.4              | 5.6             |
| Uralic Peoples            | 1.4              | 24.8            |
| Central Asians            | 0.4              | 3.0             |

*Source: Obshchii svod po imperii rezul'tatov razrabotki dannykh pervoi vseobshchei perepisi naseleniia, proizvedennoi 28 ianvaria 1897 goda: in 2 vols. (St. Petersburg: Tipografia N. L. Nyrkina, 1905), 2:139.*

TABLE 6 *Enrollment of school-aged children in primary schools in 1903, %*

| Educational District | Number of Residents per Single Ministry of Public Education School | Enrollment of Children, % |                                                          |
|----------------------|--------------------------------------------------------------------|---------------------------|----------------------------------------------------------|
|                      |                                                                    | %                         | Number of Times Greater than in Turkestan, Turkestan = 1 |
| Riga                 | 936                                                                | 100                       | 17                                                       |
| St. Petersburg       | 2,284                                                              | 58                        | 10                                                       |
| Moscow               | 2,445                                                              | 54                        | 9                                                        |
| Warsaw               | 2,549                                                              | 52                        | 9                                                        |
| Odessa               | 2,704                                                              | 49                        | 8                                                        |
| Kazan'               | 3,112                                                              | 42                        | 7                                                        |
| Khar'kov             | 3,398                                                              | 39                        | 7                                                        |
| Eastern Siberia      | 3,458                                                              | 38                        | 6                                                        |
| Orenburg             | 3,838                                                              | 34                        | 6                                                        |
| Caucasus             | 4,805                                                              | 27                        | 5                                                        |
| Kiev                 | 5,315                                                              | 25                        | 4                                                        |
| Vilna                | 5,481                                                              | 24                        | 4                                                        |
| Western Siberia      | 11,833                                                             | 11                        | 2                                                        |
| Turkestan            | 21,750                                                             | 6                         | 1                                                        |
| The Empire           | 3,371                                                              | 39                        | 7                                                        |

*Source:* Calculated from *Vsepoddanneishii otchet Ministra narodnogo prosvechshenia za 1903 god* (St. Petersburg: Senatskaia tipografia, 1905), 502–6.
